# Supplementary material for: Desensitization in patients with hypersensitivity to platinum and taxane in gynecological cancers
Source: PubMed Central journal article supplement (PMC10807606; doi:10.1002/cam4.6840), 2023-12-22

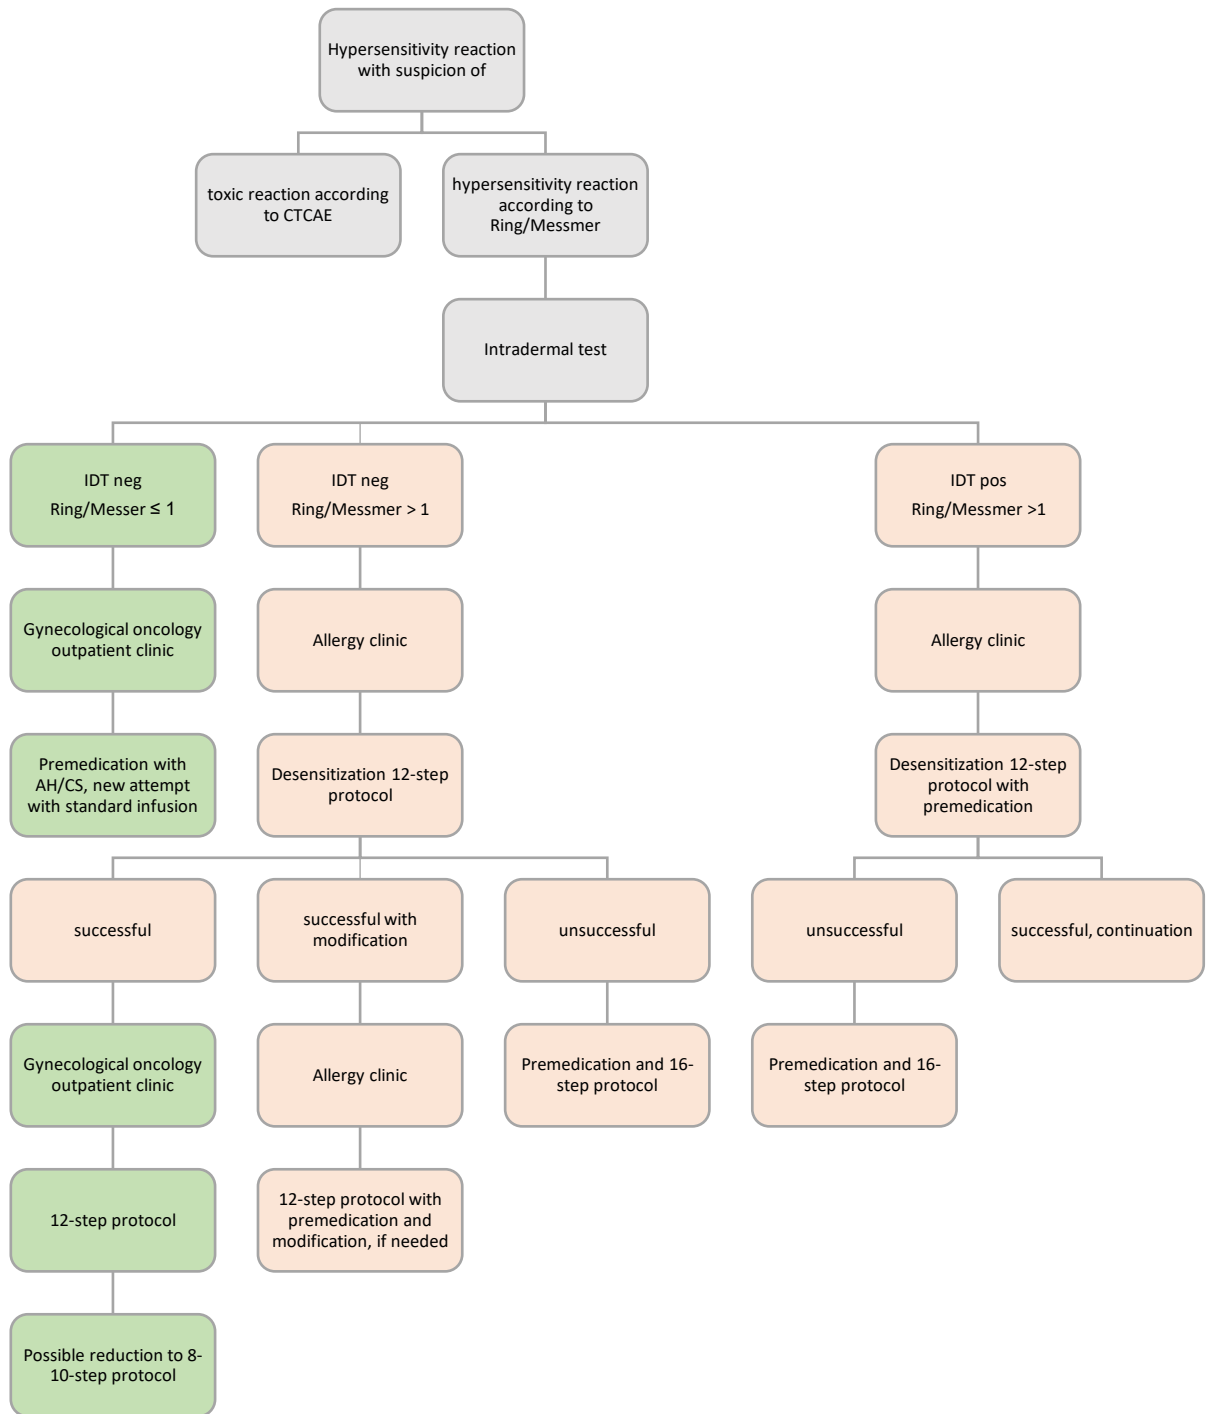

Supplement: CAM4-13-e6840-s003.pdf [file CAM4-13-e6840-s003.pdf]
